# Supplementary material for: Genome-wide analysis of transcription-coupled repair reveals novel transcription events in Caenorhabditis elegans
Source: PubMed Central journal article supplement — bioRxiv. 2024 Mar 29:2023.10.12.562083. Originally published 2023 Oct 17. Preprint. [Version 2] doi: 10.1101/2023.10.12.562083 (PMC10614815; doi:10.1101/2023.10.12.562083), 2024-03-29
Supplement: media-1.pdf [file media-1.pdf]

**Supplementary Figure 1. Single nucleotide frequencies for 19-30nt-long reads obtained by XR-seq.** The enrichment of TC, CT and TT for (6-4)PP XR-seq and that of mainly TT for CPD XR-seq are at position 6 nucleotide from the 3' end of the excised oligos starting from the 28nt in length through 19nt in length. For downstream analysis, we selected 19-24nt-long reads.

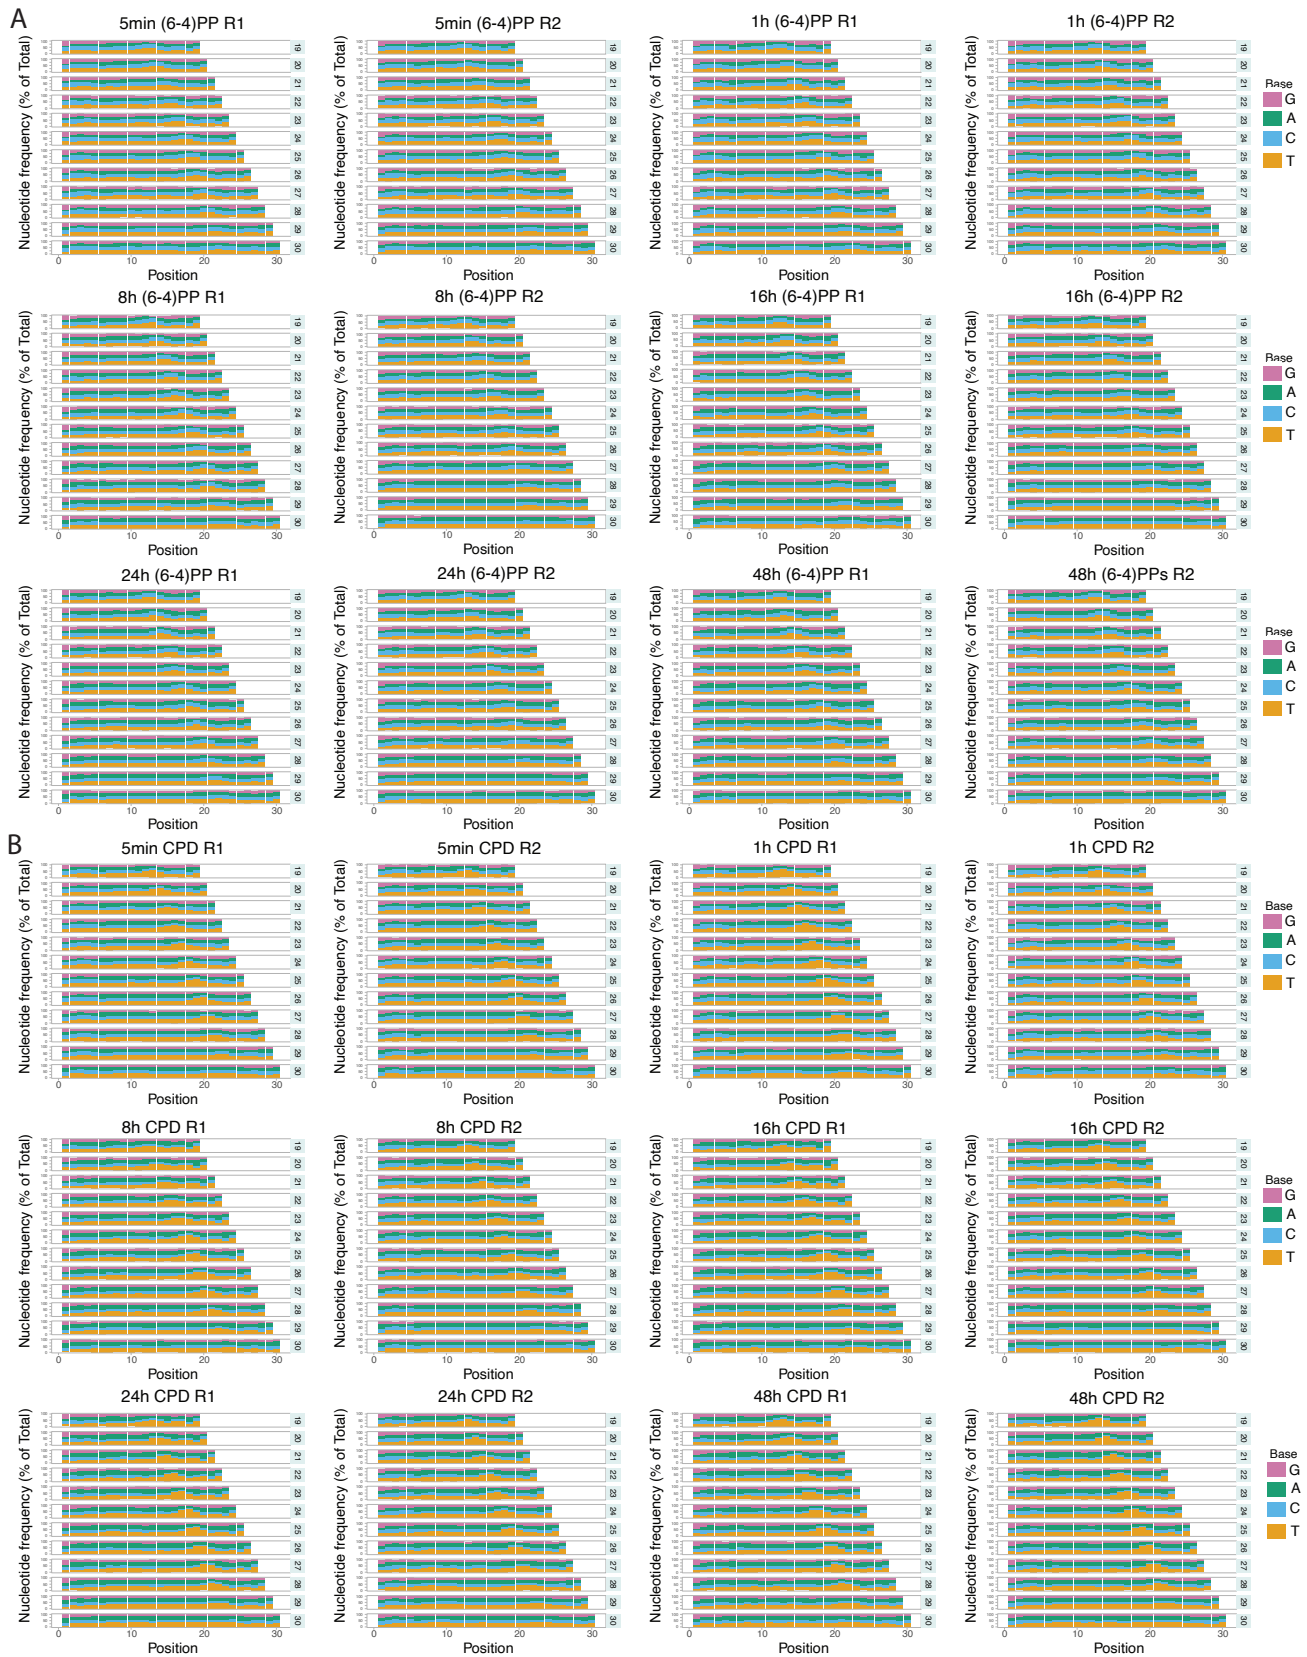

**Supplementary Figure 2. TT and TC dinucleotides in the transcribed and non-transcribed strands.** (A) The number of TT dinucleotides in the transcribed strand is highly correlated with that in the non-transcribed strand. (B) The number of TC dinucleotides in the transcribed strand is highly correlated with that in the non-transcribed strand. Gene length is a good proxy for the number of TT and TC dinucleotides, and thus we use RPKM for normalization for XR-seq repair read counts.

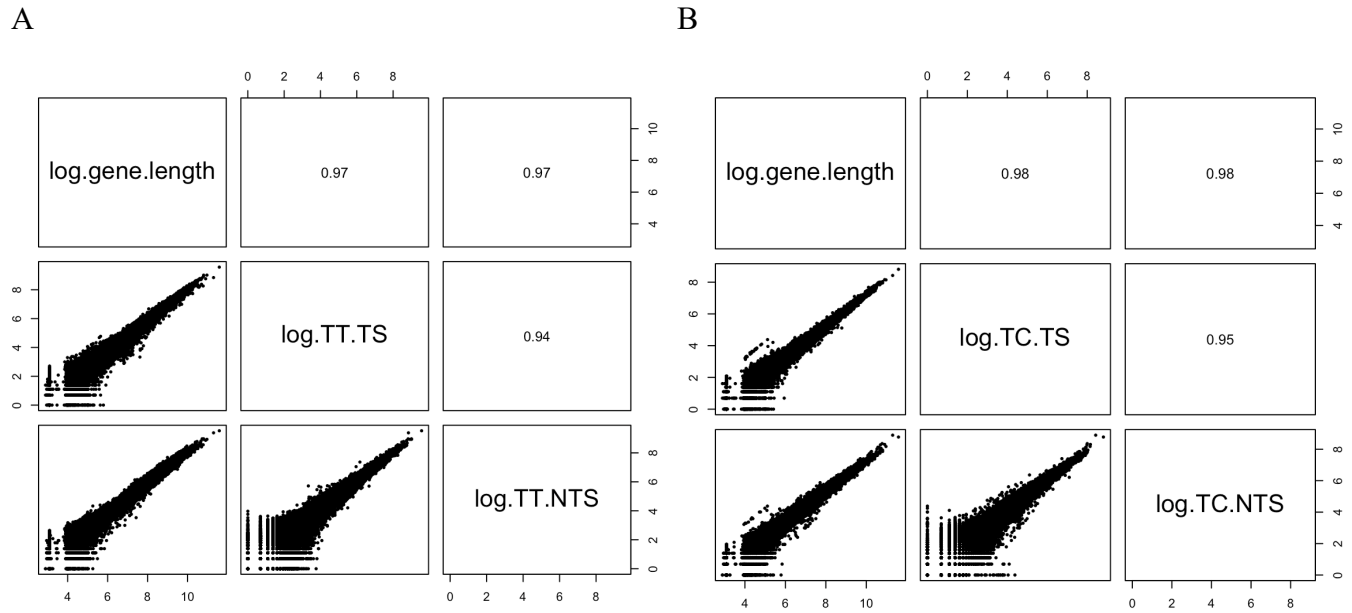

**Supplementary Figure 3. High reproducibility between each pair of XR-seq replicates.** Normalized gene-specific repair is shown as each dot. Spearman correlation coefficient is shown.

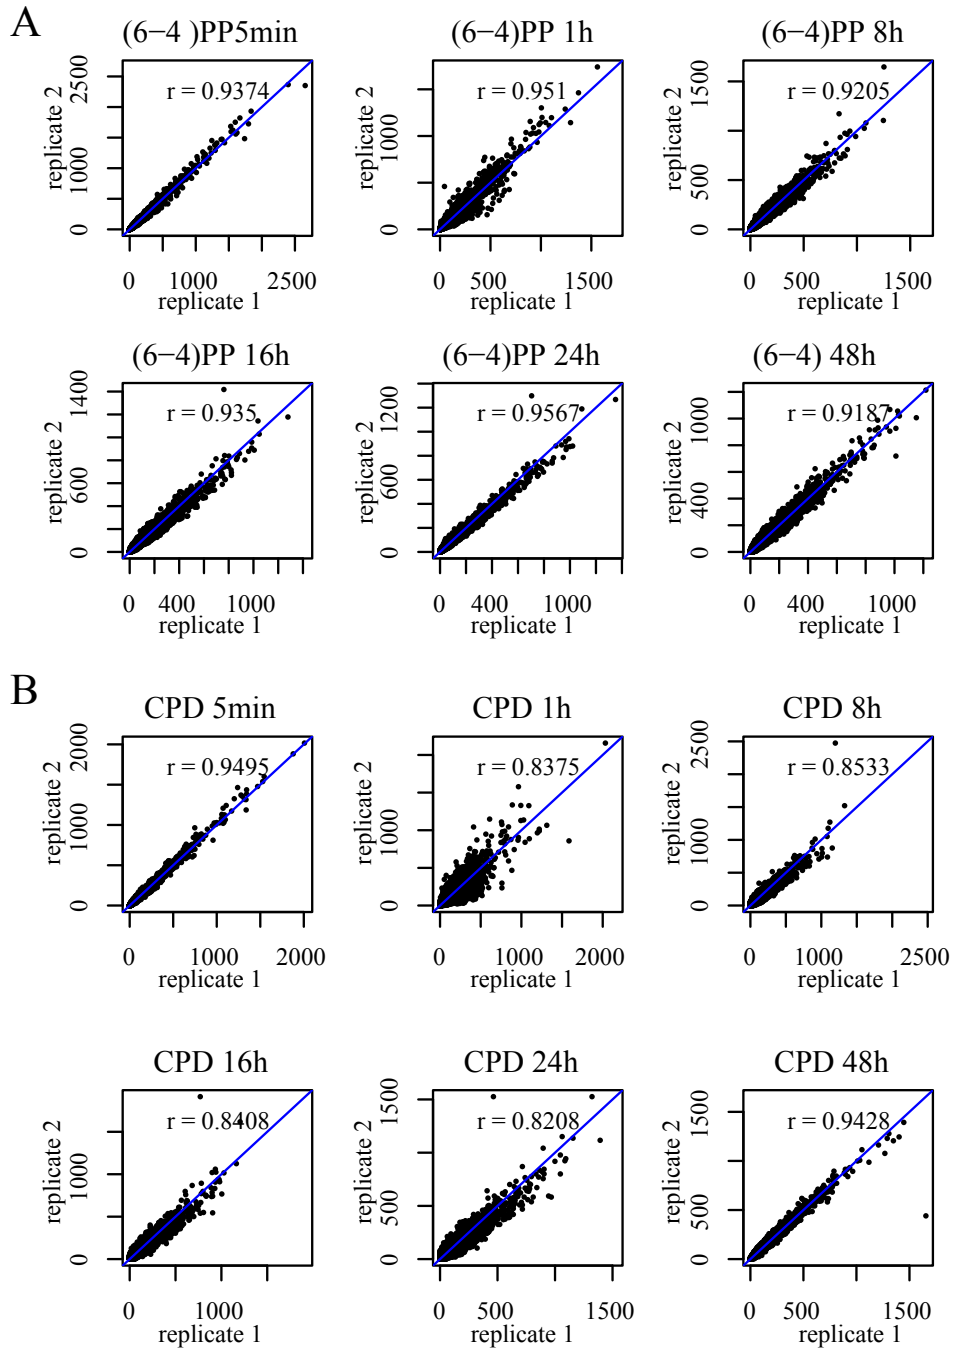

**Supplementary Figure 4. Pairwise correlation of transcription-coupled repair from the transcribed strand as measured by XR-seq.** Spearman correlation coefficient is calculated between each pair of the XR-seq samples using the normalized read counts. Samples from the (6-4)PP and CPD XR-seq cluster together, with temporal changes observed at different timepoints.

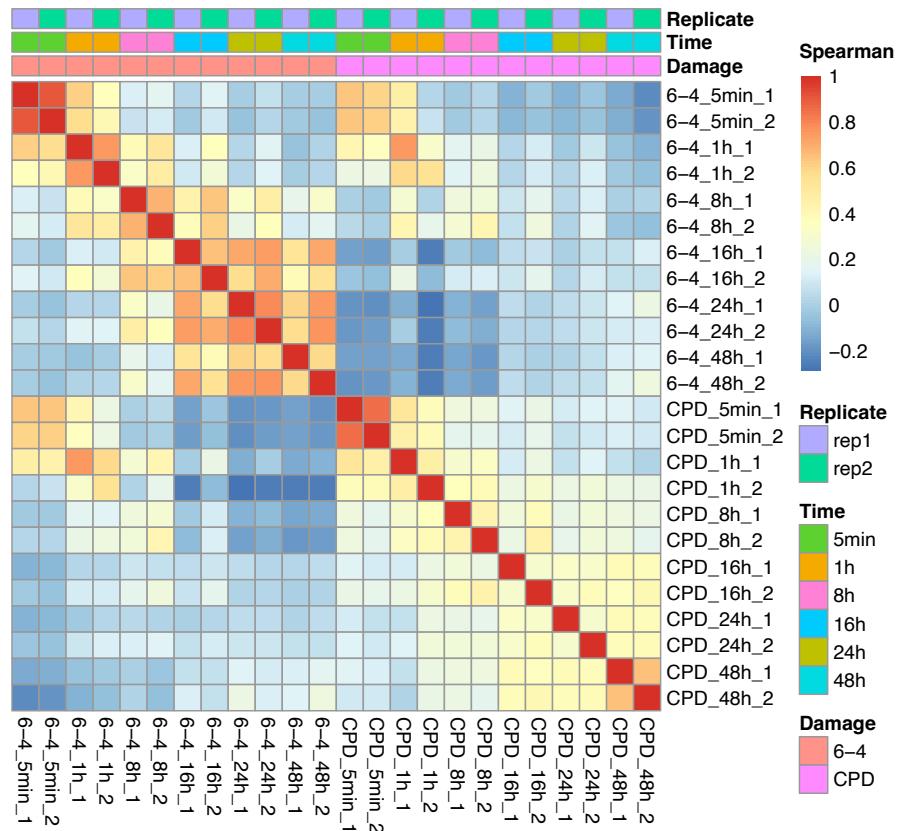

**Supplementary Figure 5.** Average profile of two repeats (6-4)PP (A) and CPD (B) XR-seq on the transcribed strand (TS) and non-transcribed strand (NTS) over all reference genes at 5 minutes, 1, 8, 16, 24 and 48h after UV treatment. RPKM is reads per kilobase per million total reads. Data for each strand were scaled to a unit gene (as detailed in Materials and Methods) to represent average repair in RNA Polymerase II-transcribed genes and the 2 kb upstream and downstream.

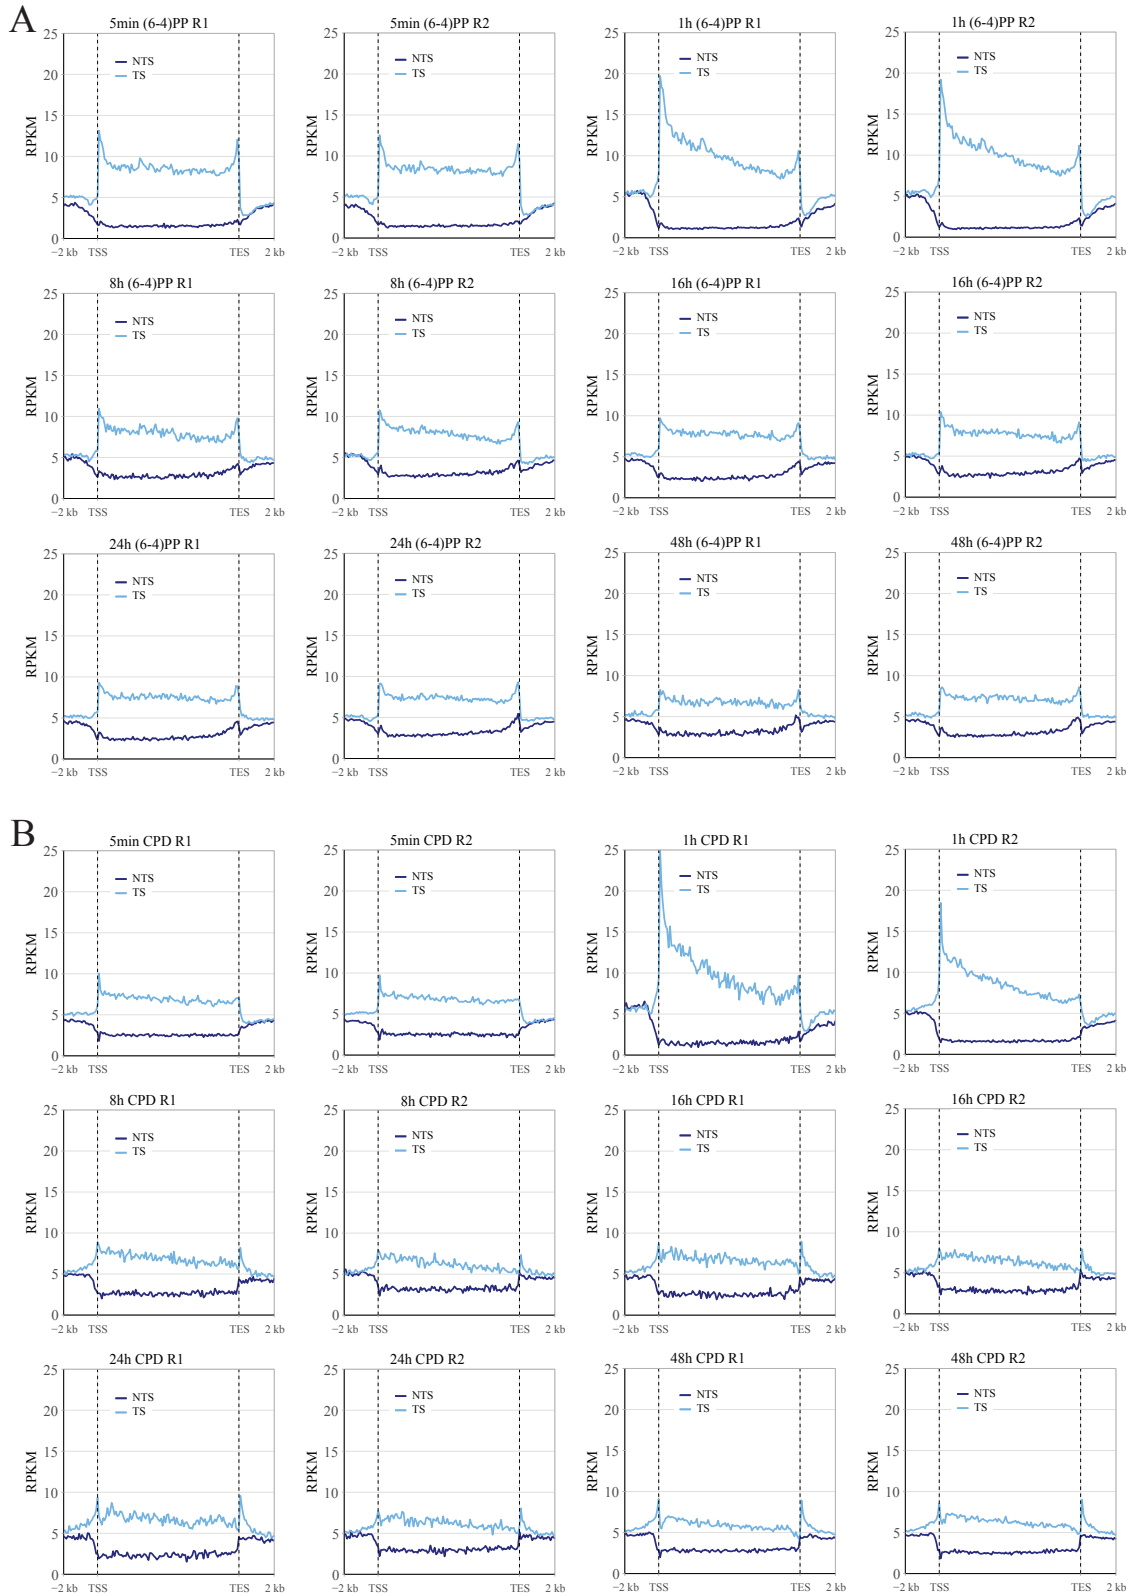

**Supplementary Figure 6. Transcription events captured by XR-seq is highly correlated with the transcription captured by capped RNA-seq.** XR-seq repair signals correlate with short- and long-capped RNA-seq signals much better than conventional RNA-seq. Pairwise smooth scatterplots are shown on the lower triangle; Spearman correlation coefficients are shown on the upper triangle, with text size proportionate to the absolute value of the coefficient.

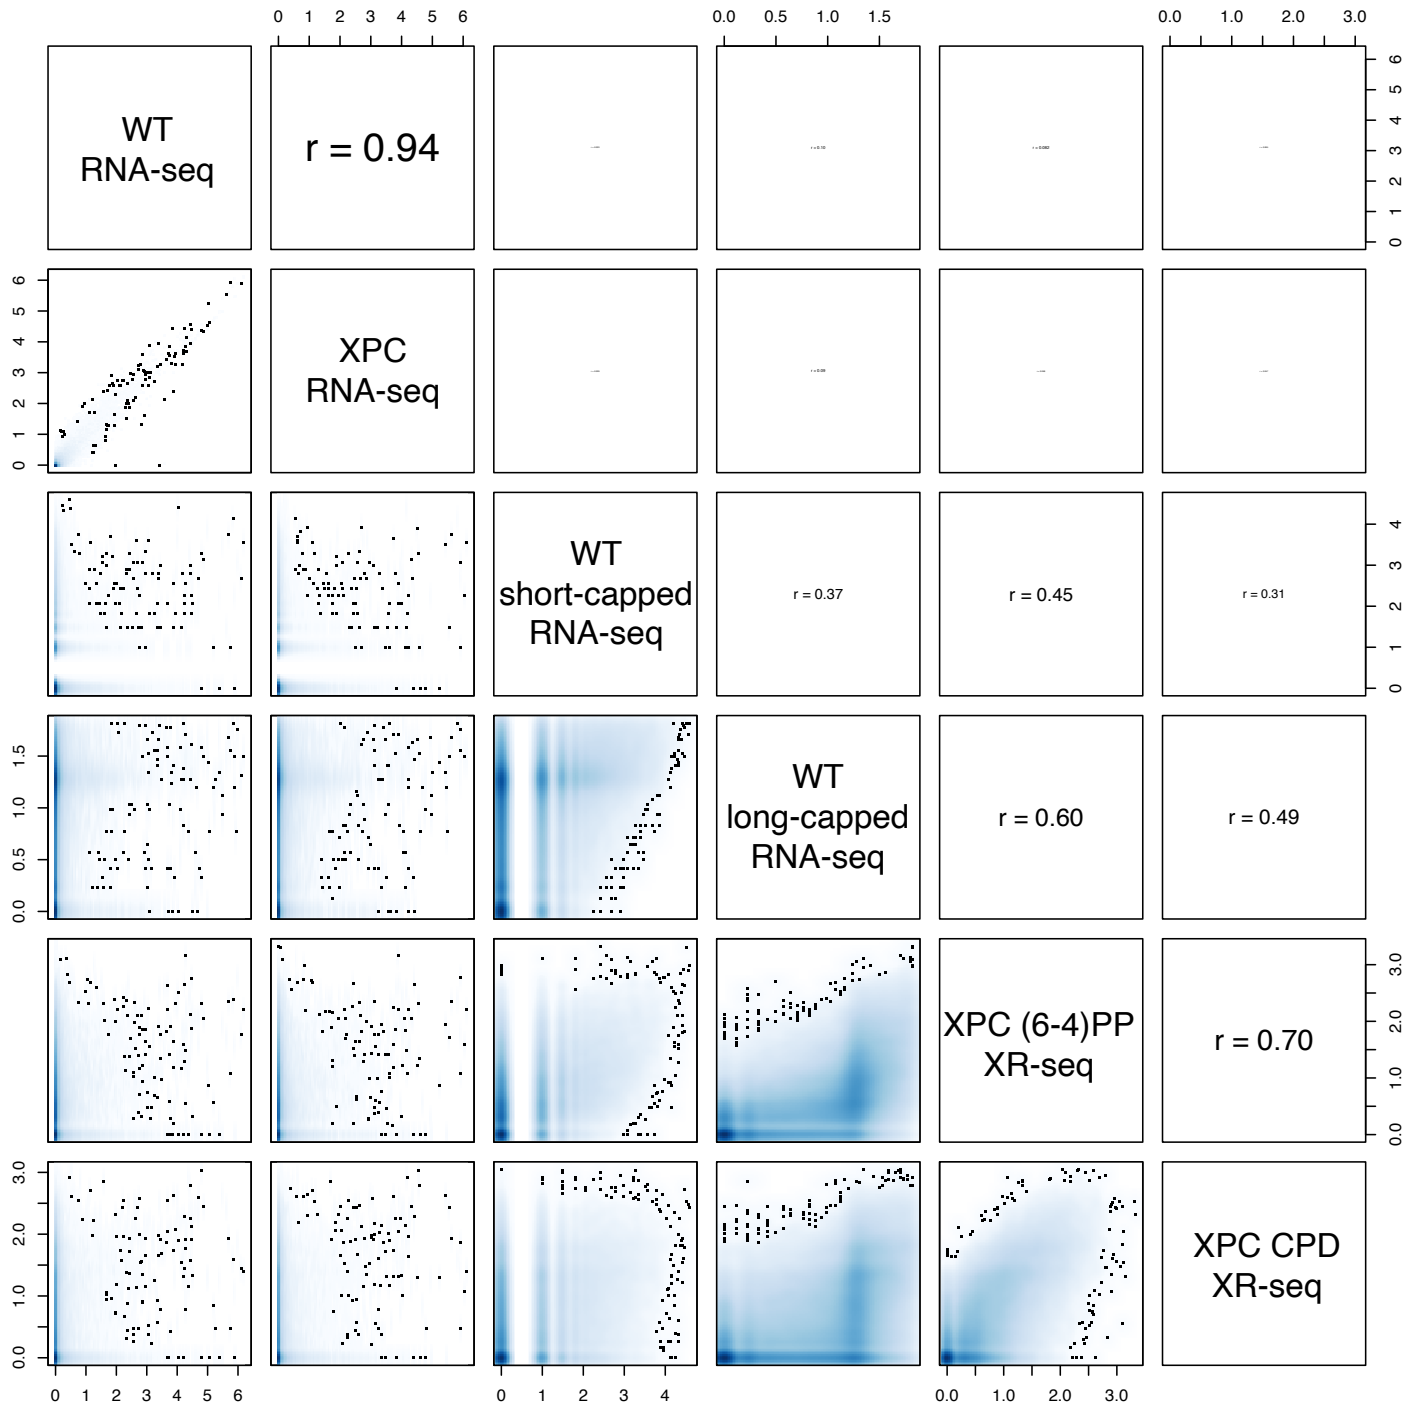

**Supplementary Table 1. XR-seq sample information.** Summary of *C. elegans* (6-4)PP and CPD XR-seq samples across different timepoints and replicates. Total\_mapped: total mapped reads. Dedup: deduplicated reads. Mapq: reads with mapping quality > 20 (reads that are equally mapped to multiple genomic locations are removed with this QC). Chr: reads mapped to chrI, II, III, IV, V, X. Qwidth: reads with lengths 19-24. GenebodyPromoter: reads mapped to genes and 2 Kb upstream of transcription start sites (i.e., promoters). Genebody: reads mapped to genes.

| Sample_name                             | Damage | Repair_time | Replicate | total_mapped | dedup    | mapq    | chr     | qwidth  | genebodypromoter | genebody |         |
|-----------------------------------------|--------|-------------|-----------|--------------|----------|---------|---------|---------|------------------|----------|---------|
| CExpcL15m4KR164_TTAGGC_S12_L001_R1_001  | 6-4    | 5min        | 1         | 3354876      | 3329717  | 2751808 | 2747753 | 1420219 | 1316728          | 1088150  |         |
| CExpcL15m4KR264_TGACCA_S14_L001_R1_001  |        |             | 2         | 3434248      | 3411177  | 2863138 | 2857944 | 1284786 | 1190326          | 981346   |         |
| CEL1xpc64_GATCAG_S1_L008_R1_001         |        | 1h          | 1         | 9492312      | 8950194  | 6729601 | 6707813 | 3164856 | 2933350          | 2355648  |         |
| XPCL11h64_CAGGCG_S69_L006_R1_001        |        |             | 2         | 6559541      | 6460451  | 5346772 | 5339079 | 2576659 | 2380790          | 1907932  |         |
| xpcl1B4k8hR164_CTCAGA_S28               |        | 8h          | 1         | 2286434      | 2252038  | 1077462 | 1075440 | 525603  | 477677           | 373260   |         |
| xpcl1B4k8hR364_GATCAG_S9                |        |             | 2         | 8370958      | 8186326  | 5851038 | 5824176 | 1409732 | 1279984          | 1000554  |         |
| xpcl1B4k16hR164_GACGAC_S20              |        | 16h         | 1         | 2895387      | 2830981  | 1852461 | 1848471 | 943683  | 856688           | 668563   |         |
| xpcl1B4k16hR364_TAGCTT_S1               |        |             | 2         | 5684434      | 5486207  | 4583648 | 4561086 | 1192213 | 1081847          | 844950   |         |
| xpcl1B4k24hR164_TAATCG_S22              |        | 24h         | 1         | 4946336      | 4810633  | 3599295 | 3588403 | 1638515 | 1481981          | 1151039  |         |
| xpcl1B4k24hR364_GGCTAC_S3               |        |             | 2         | 10815325     | 10583435 | 8104453 | 8072503 | 2203131 | 1990334          | 1548442  |         |
| xpcl1B4k48hR164_TACAGC_S24              |        | 48h         | 1         | 1825849      | 1782186  | 1174881 | 1168156 | 474893  | 425263           | 321796   |         |
| xpcl1B4k48hR364_CTTGTA_S5               |        |             | 2         | 4987318      | 4804692  | 3823173 | 3806272 | 1502307 | 1356136          | 1049418  |         |
| CExpcL15m4KR1CPD_GCCAAT_S13_L001_R1_001 |        | CPD         | 5min      | 1            | 5837318  | 5763808 | 4072843 | 4053858 | 1452895          | 1300422  | 981492  |
| CExpcL15m4KR2CPD_CAGATC_S15_L001_R1_001 |        |             |           | 2            | 4302562  | 4264267 | 2958176 | 2944500 | 1067358          | 954165   | 719738  |
| CEL1xpcCPD_ACTTGA_S2_L008_R1_001        |        |             | 1h        | 1            | 1717268  | 1710614 | 524924  | 522437  | 227281           | 211003   | 166995  |
| XPCL11hCPD_CATTTT_S70_L006_R1_001       |        |             |           | 2            | 5843021  | 5804098 | 4092344 | 4077700 | 1921303          | 1731004  | 1274284 |
| xpcl1B4k8hR1CPD_CATTTT_S29              | 8h     |             | 1         | 1340986      | 1327771  | 746362  | 743063  | 314802  | 280403           | 201968   |         |
| xpcl1B4k8hR3CPD_TGACCA_S10              |        |             | 2         | 3094513      | 3042372  | 1355727 | 1346939 | 403994  | 355247           | 250147   |         |
| xpcl1B4k16hR1CPD_CCAACA_S21             | 16h    |             | 1         | 1082126      | 1072088  | 590778  | 588731  | 259173  | 230254           | 165860   |         |
| xpcl1B4k16hR3CPD_ACAGTG_S2              |        |             | 2         | 1704743      | 1656693  | 982544  | 976155  | 357955  | 315907           | 224116   |         |
| xpcl1B4k24hR1CPD_CGGAAT_S23             | 24h    |             | 1         | 684978       | 679498   | 419344  | 417964  | 196339  | 173972           | 123874   |         |
| xpcl1B4k24hR3CPD_GCCAAT_S4              |        |             | 2         | 1404716      | 1389973  | 814922  | 810876  | 316865  | 278957           | 197723   |         |
| xpcl1B4k48hR2CPD_CGGAAT_S29             | 48h    |             | 1         | 2943738      | 2844139  | 1969532 | 1952041 | 1023631 | 897604           | 619118   |         |
| xpcl1B4k48hR3CPD_CAGATC_S6              |        |             | 2         | 5145059      | 5055556  | 3671400 | 3654971 | 1685725 | 1484541          | 1041861  |         |

**Supplementary Table 2. Epigenomic data of L1 *C. elegans* adopted in this study.**

| Epigenomics | Measures                 | <i>C. elegans</i> stage           | Accession + bigwig                     |                             |
|-------------|--------------------------|-----------------------------------|----------------------------------------|-----------------------------|
| ATAC-seq    | Chromatin accessibility  | L1                                | GSE114439_atac_wt_l1.bw                |                             |
| DNase-seq   | DNase I hypersensitivity | L1                                | GSM3142662_dnase_wt_l1_rep1_100U_ml.bw |                             |
| ChIP-seq    | H3K4me1                  | Histone modification (activation) | L1                                     | GSE114440_H3K4me1_wt_l1.bw  |
|             | H3K4me3                  | Histone modification (activation) | L1                                     | GSE114440_H3K4me3_wt_l1.bw  |
|             | H3K27me3                 | Histone modification (repression) | L1                                     | GSE114440_H3K27me3_wt_l1.bw |
